# Improving the accuracy of single turnover active fluorometry (STAF) for the estimation of phytoplankton primary productivity (PhytoPP)

1 **Tobias G. Boatman**<sup>1</sup>, **Richard J. Geider**<sup>2</sup>, **Kevin Oxborough**<sup>3\*</sup>

2 <sup>1</sup>Department of Chemical Engineering, Imperial College, London, SW7 2AZ, UK

3 <sup>2</sup>School of Biological Sciences, University of Essex, Colchester, CO4 3SQ, UK

4 <sup>3</sup>Chelsea Technologies Group Ltd, 55 Central Avenue, West Molesey, Surrey, KT8 2QZ, UK

5 **\* Correspondence:**

6 Kevin Oxborough

7 [koxborough@chelsea.co.uk](mailto:koxborough@chelsea.co.uk)

8 **Word count: 7389**

9 Figures: 6

10 Tables: 7

11 **Keywords: photosynthesis, primary productivity, Photosystem II, chlorophyll fluorescence,**  
12 **package effect, ocean color.**

13 **Abstract**

14 Photosystem II (PSII) photochemistry is the ultimate source of reducing power for phytoplankton  
15 primary productivity (PhytoPP). Single turnover active chlorophyll fluorometry (STAF) provides a  
16 non-intrusive method that has the potential to measure PhytoPP on much wider spatiotemporal scales  
17 than is possible with more direct methods such as <sup>14</sup>C fixation and O<sub>2</sub> evolved through water  
18 oxidation. Application of a STAF-derived absorption coefficient for PSII light-harvesting ( $a_{LHII}$ )  
19 provides a method for estimating PSII photochemical flux on a unit volume basis ( $JV_{PII}$ ). Within this  
20 study, we assess potential errors in the calculation of  $JV_{PII}$  arising from sources other than  
21 photochemically active PSII complexes (baseline fluorescence) and the package effect. Although our  
22 data show that such errors can be significant, we identify fluorescence-based correction procedures  
23 that can be used to minimize their impact. For baseline fluorescence, the correction incorporates an  
24 assumed consensus PSII photochemical efficiency for dark-adapted material. The error generated by  
25 the package effect can be minimized through the ratio of variable fluorescence measured within  
26 narrow wavebands centered at 730 nm, where the re-absorption of PSII fluorescence emission is  
27 minimal, and at 680 nm, where re-absorption of PSII fluorescence emission is maximal. We conclude  
28 that, with incorporation of these corrective steps, STAF can provide a reliable estimate of  $JV_{PII}$  and,  
29 if used in conjunction with simultaneous satellite measurements of ocean color, could take us  
30 significantly closer to achieving the objective of obtaining reliable autonomous estimates of PhytoPP.

31 **1 Introduction**

32 Phytoplankton contribute approximately half the photosynthesis on the planet (Field, 1998), thus  
33 forming the base of marine food webs. Reliable assessment of Phytoplankton Primary Productivity  
34 (PhytoPP) is crucial to an understanding of the global carbon and oxygen cycles and oceanic

35 ecosystem function. Consequently, PhytoPP has been recognized as an Essential Ocean Variable  
36 (EOV) within the Global Ocean Observing System (GOOS). PhytoPP is a dynamic biological  
37 process that responds to variability in multiple environmental drivers including light, temperature and  
38 nutrients across spatial scales from meters to ocean basins, and time scales from minutes to tens of  
39 years. This poses significant challenges for measuring and monitoring PhytoPP.

40 Historically, the most frequently employed method for assessing PhytoPP has been the fixation of  
41  $^{14}\text{C}$  within closed systems over several hours of incubation (Marra, 2002; Milligan et al. 2015).  
42 Despite the widespread use of the  $^{14}\text{C}$  method, which has led to measurements of PhytoPP by the  $^{14}\text{C}$   
43 method providing the database against which remote sensing estimates of primary production are  
44 calibrated (Bouman et al. 2018), there is considerable uncertainty in what exactly the  $^{14}\text{C}$  method  
45 measures and the accuracy of bottle-incubation based methods for obtaining PhytoPP in oligotrophic  
46 ocean waters (Quay et al. 2010).

47 According to Marra (2002), the  $^{14}\text{C}$  technique measures somewhere between net and gross carbon  
48 fixation, depending on the length of the incubation. In this context, net carbon fixation is defined as  
49 gross carbon fixation minus carbon respiratory losses and light-dependent losses due to  
50 photorespiration and light-enhanced mitochondrial respiration (Milligan et al. 2015). Although it may  
51 seem intuitive that short incubations should provide a good estimate of gross carbon fixation (and  
52 closely match PhytoPP), several authors have reported that short-term  $^{14}\text{C}$  fixation does not reliably  
53 measure net or gross production (e.g. Halsey et al. 2013; Milligan et al. 2015). It should also be noted  
54 that short-term, in the context of  $^{14}\text{C}$  fixation, is several hours incubation. This clearly imposes major  
55 limitations on the spatiotemporal scales at which PhytoPP can be assessed using this method.

56 Gross photosynthesis by phytoplankton is defined here as the rate at which reducing power is  
57 generated by photosystem II (PSII) through the conversion of absorbed light energy (PSII  
58 photochemistry). Within this study, gross photosynthesis is quantified by measuring the rate at which  
59  $\text{O}_2$  is evolved through water oxidation by PSII photochemistry (Ferron et al. 2016) and is termed  
60 PhytoGO. Although measurement of  $\text{O}_2$  evolution provides some advantages over  $^{14}\text{C}$  fixation, in  
61 that both gross and net primary production can be obtained, the spatiotemporal limitations are  
62 similar.

63 It is now widely accepted that active fluorometry can provide a non-intrusive method for measuring  
64 PSII photochemistry on much wider spatiotemporal scales than either  $^{14}\text{C}$  fixation or  $\text{O}_2$  evolution.  
65 Within oceanic systems, where optically thin conditions are the norm, the most appropriate form of  
66 active fluorometry is the single turnover method (Kolber and Falkowski 1993; Kolber et al. 1998;  
67 Moore et al. 2006; Suggett et al. 2001; Oxborough et al. 2012). One important parameter generated  
68 by single turnover active fluorometry (STAF) is the absorption cross section of PSII photochemistry  
69 ( $\sigma_{\text{PSII}}$  in the dark-adapted state,  $\sigma_{\text{PSII}}'$  in the light-adapted state, see Terminology) with units of  $\text{m}^2 \text{PSII}^{-1}$   
70  $^1$  (Kolber et al. 1998; Oxborough et al. 2012). This parameter allows for the calculation of PSII  
71 photochemical flux through a single PSII center, as the product of  $\sigma_{\text{PSII}}'$  and incident photon irradiance  
72 ( $E$ , with units of  $\text{photons m}^{-2} \text{s}^{-1}$ ). PSII photochemical flux has units of  $\text{photons PSII}^{-1} \text{s}^{-1}$  or  
73 (assuming an efficiency of one stable photochemical event per photon)  $\text{electrons PSII}^{-1} \text{s}^{-1}$  (Equation  
74 1).

$$75 \quad J_{\text{PSII}} = \sigma_{\text{PSII}}' \cdot E \quad \text{Equation 1}$$

76 Both PhytoPP and PhytoGO can be reported per unit volume (SI units of  $\text{C m}^{-3} \text{s}^{-1}$  or  $\text{O}_2 \text{m}^{-3} \text{s}^{-1}$ ,  
77 respectively). Given that  $J_{\text{PSII}}$  provides the photochemical flux through the  $\sigma_{\text{PSII}}'$  provided by a single

78 PSII, the PSII photochemical flux per unit volume ( $JV_{\text{PSII}}$ , with units of electrons  $\text{m}^{-3} \text{s}^{-1}$ ) can be  
79 defined as the flux through the absorption cross section of PSII photochemistry provided by all open  
80 PSII centers within the volume (Equation 2).

$$81 \quad JV_{\text{PSII}} = \sigma_{\text{PSII}}' \cdot [\text{PSII}] \cdot (1 - C) \cdot E \quad \text{Equation 2}$$

82 Where [PSII] is the concentration of photochemically active PSII complexes, with units of PSII  $\text{m}^{-3}$ ,  
83 and  $(1 - C)$  is the proportion of these centers that are in the open state at the point of measurement  
84 under actinic light. It follows that  $JV_{\text{PSII}}$  can, in principle, provide a proxy for PhytoPP (Oxborough et  
85 al. 2012).

86 An important caveat to using  $JV_{\text{PSII}}$  as a proxy for PhytoPP is that there are a number of processes  
87 operating within phytoplankton that can uncouple PhytoPP from PhytoGO and PhytoGO from PSII  
88 photochemistry (Geider and MacIntyre 2002; Behrenfeld et al. 2004; Halsey et al. 2010; Suggett et  
89 al. 2010; Lawrenz et al. 2013). It follows that  $JV_{\text{PSII}}$  provides an upper limit for PhytoPP which is  
90 defined by the release of each  $\text{O}_2$  requiring a minimum of four photochemical events and each  $\text{O}_2$   
91 released resulting in the maximum assimilation of one  $\text{CO}_2$ .

92 Previous studies obtained a value for the [PSII] term within Equation 2 from discrete samples of  
93 chlorophyll *a* by assuming that the number of PSII centers per chlorophyll *a* ( $n_{\text{PSII}}$ ) is relatively  
94 constant (Kolber & Falkowski, 1993; Suggett et al., 2001). A significant problem with this approach  
95 is that  $n_{\text{PSII}}$  shows significant variability, both in laboratory-based cultures (Suggett et al. 2004) and  
96 in natural phytoplankton communities (Moore et al. 2006; Suggett et al. 2006). In addition, the  
97 derivation of  $n_{\text{PSII}}$  requires a chlorophyll *a* extraction for each sample: a requirement that imposes  
98 significant spatiotemporal limitations.

99 A STAF-based method for the determination of [PSII] was described by Oxborough et al. (2012).  
100 This method operates on the assumption that the ratio of rate constants for PSII photochemistry ( $k_{\text{PSII}}$ )  
101 and PSII fluorescence emission ( $k_{\text{FII}}$ ) falls within a narrow range across all phytoplankton types. One  
102 consequence of this assumption is illustrated by Equation 3.

$$103 \quad [\text{PSII}] \propto \frac{k_{\text{PSII}}}{k_{\text{FII}}} \cdot \frac{F_0}{\sigma_{\text{PSII}}} \quad \text{Equation 3}$$

104 Where  $F_0$  is the 'origin' of variable fluorescence from a dark-adapted sample (see Terminology). Data  
105 from a follow-up study (Silsbe et al. 2015), were entirely consistent with Equation 3 and were used to  
106 derive a sensor type-specific constant, termed  $K_a$ , for the FastOcean fluorometer (CTG Ltd, West  
107 Molesey, UK). It follows that:

$$108 \quad [\text{PSII}] = K_a \cdot \frac{F_0}{\sigma_{\text{PSII}}} \quad \text{Equation 4}$$

109 It is worth noting that  $K_a$  and [PSII], within Equation 4, are spectrally independent while, for a  
110 homogeneous population,  $F_0$  and  $\sigma_{\text{PSII}}$  are expected to covary with measurement LED intensity.

111 As noted by Oxborough et al. (2012), Equation 3 is only valid if a high proportion of the fluorescence  
112 signal at  $F_0$  comes from PSII complexes that are photochemically active and in the open state. While  
113 it is reasonable to expect that most photochemically active PSII complexes will be in the open state at  
114  $t = 0$  during a STAF measurement, there are situations where a significant proportion of the  
115 fluorescence signal at  $F_0$  may come from sources other than photochemically active PSII complexes.  
116 This becomes a concern when the observed ratio of variable fluorescence ( $F_v$ ) to maximum

117 fluorescence ( $F_m$ ) from a dark-adapted sample is low: although the maximum observed  $F_v/F_m$  varies  
118 among phytoplankton taxa, it is generally within the range of 0.5 to 0.6 for the fluorometers used  
119 within this study.

120 One plausible explanation for sub-maximal  $F_v/F_m$  values is that PSII photochemistry is  
121 downregulated by high levels of Stern-Volmer quencher within the PSII pigment matrix. As with  
122 measurement LED intensity,  $F_o$  and  $\sigma_{PII}$  covary with Stern-Volmer quenching and Equation 4  
123 remains valid. Light-dependent accumulation of Stern-Volmer quencher within the PSII pigment  
124 matrix generates non-photochemical quenching of PSII fluorescence (NPQ) within a wide range of  
125 phytoplankton groups (Olaizola and Yamamoto 1994; Demmig-Adams and Adams 2006; Goss and  
126 Jakob 2010; Krause and Jahns, 2004). However, this form of quenching is generally reversed within  
127 tens of seconds to a few minutes dark-adaptation and would therefore not be expected to significantly  
128 decrease  $F_v/F_m$ .

129 A second plausible explanation for sub-maximal  $F_v/F_m$  values is that a proportion of the signal at  $F_o$   
130 is generated by PSII complexes that lack photochemically active reaction centers. Under the  
131 assumption that these complexes are not energetically coupled to photochemically active PSII  
132 complexes, their presence would increase  $F_o$  but have no impact on  $\sigma_{PII}$ . Consequently, the value of  
133 [PSII] generated by Equation 4 would increase in proportion to the increase in measured  $F_o$ . Within  
134 this manuscript, the fraction of  $F_o$  that does not originate from open PSII complexes is termed  
135 baseline fluorescence ( $F_b$ ) and the fraction that does is termed baseline-corrected  $F_o$  ( $F_{oc}$ , see  
136 Terminology).

137 Within Equation 2,  $JV_{PII}$  is proportional to the product of [PSII] and  $(1 - C)$  during a STAF  
138 measurement under actinic light. A value for the concentration of photochemically active PSII  
139 centers can be generated from a STAF measurement made on a dark-adapted sample using Equation  
140 4. The proportion of these complexes in the open state has routinely been estimated through the qP  
141 parameter (Kolber et al. 1998) which is mathematically equivalent to the photochemical factor  
142 ( $F_q'/F_v'$ ) defined by Baker and Oxborough (2004). This requires determination of  $F_o'$ , using the  
143 equation provided by Oxborough and Baker (1997) or through direct measurement after 1 – 2 s dark-  
144 adaptation following a STAF measurement under actinic light (Kolber et al. 1998).

145 As an alternative to Equation 2, Oxborough et al. (2012) include a method for calculating  $JV_{PII}$  that  
146 does not require [PSII],  $(1 - C)$  or  $\sigma_{PII}$  (Equation 5).

147 
$$JV_{PII} = a_{LHII} \cdot \frac{F_q'}{F_m'} \cdot E \quad \text{Equation 5}$$

148 Where  $a_{LHII}$  is the absorption coefficient for PSII light harvesting, with SI units of  $m^{-1}$ . A value for  
149  $a_{LHII}$  can be derived using Equation 6.

150 
$$a_{LHII} = K_a \cdot \frac{F_m - F_o}{F_m \cdot F_o} \quad \text{Equation 6}$$

151 The link between Equations 2 and 5 is illustrated by Equation 7 (Kolber et al. 1998) and Equation 8  
152 (Oxborough et al. 2012) .

153 
$$\sigma_{LHII} = \sigma_{PII} / \frac{F_v}{F_m} \quad \text{Equation 7}$$

154 
$$a_{LHII} = \sigma_{LHII} \cdot [PSII] \quad \text{Equation 8}$$

155 The package effect is a consequence of the high concentration of chlorophyll a and other light-  
156 absorbing pigments within phytoplankton cells. To put this in context, while the concentration of  
157 chlorophyll a within the open ocean is often below  $0.1 \text{ mg m}^{-3}$ , the concentration within  
158 phytoplankton cells is approximately a million times higher than this, at  $0.1 \text{ kg m}^{-3}$  (calculated from  
159 data within Montagnes et al. 1994). It follows that while sea water with phytoplankton cells  
160 suspended within it can be considered optically thin, the localized volume within each phytoplankton  
161 cell is optically very thick.

162 Differences in the package effect due to pigment composition and morphology among species have  
163 been identified (Berner et al., 1989; Bricaud et al. 1993; Morel and Bricaud, 1981). Even within  
164 individual phytoplankton species, levels of pigment packing vary with eco-physiological condition  
165 and life cycle (Berner et al. 1989; Falkowski and LaRoche, 1991). Increases in the magnitude of the  
166 package effect will increase the absorption of photons generated by PSII fluorescence (FII) before  
167 these photons leave the cell, and thus decrease the measured value of FII relative to PSII  
168 photochemistry (PII). Given that a fundamental assumption of the absorption method is that the  
169 relationship between PSII photochemistry (PII) and PSII fluorescence emission (FII) is reasonably  
170 constant, variability in the level of package effect among samples clearly has the potential to  
171 introduce significant errors.

172 The main objective for this study was to test the applicability of Equations 4 and 6. Because the  
173 values generated by both equations are dependent on  $K_a$ , a comprehensive evaluation of the absolute  
174 value and general applicability of  $K_a$  has been incorporated within the study. As a first step, a large  
175 number of sample-specific values of  $K_a$  were generated by combining data from parallel STAF and  
176 flash  $O_2$  measurements from eleven phytoplankton species, grown under nutrient-replete and N-  
177 limited conditions. This allowed an evaluation of the degree to which sub-maximal values of  $F_v/F_m$   
178 could be attributed to Stern-Volmer quenching or baseline fluorescence. It should be noted that the  
179 term sample-specific  $K_a$  is used to define apparent  $K_a$  values that are not corrected for baseline  
180 fluorescence. Each sample-specific  $K_a$  value referenced is the mean of all reps for a specific  
181 combination of species and growth conditions (nutrient replete or N-starved).

182 In addition to the STAF and flash  $O_2$  measurements used to generate sample-specific values of  $K_a$ ,  
183 the same measurement systems were used to run fluorescence light curves (FLCs) and oxygen light  
184 curves (OLCs) on all eleven phytoplankton species. The data generated from these measurements  
185 allowed for direct comparison of PhytoGO and  $JV_{PII}$  (from Equation 6) at multiple points through the  
186 light curves.

187 This first set of experiments provided evidence for a wider range of  $K_a$  values across species and  
188 environmental conditions than was evident in the earlier studies of Oxborough et al. (2012) and  
189 Silsbe et al. (2015). Although the intra-species variance of  $K_a$  values (between values determined for  
190 nutrient-replete and N-limited cultures) could confidently be linked to baseline fluorescence, the  
191 inter-species variance was more easily explained in terms of the package effect. To test this  
192 hypothesis, an additional set of measurements were made on 11 phytoplankton species, of which six  
193 were common to the first set of experiments. The range of species was selected to cover a wide range  
194 of cell sizes and optical characteristics. As before, sample-specific  $K_a$  values were generated from  
195 parallel flash  $O_2$  and STAF measurements. The STAF measurements were made using FastBallast  
196 fluorometers (CTG Ltd, as before) fitted with narrow bandpass filters centered at 680 nm and 730  
197 nm. These wavebands were chosen because chlorophyll a fluorescence is absorbed much more  
198 strongly at 680 nm than at 730 nm. It follows that attenuation of fluorescence emission due to the  
199 package effect will be much higher at 680 nm than at 730 nm and thus that variability of the package

200 effect among species should correlate with the ratio of fluorescence outputs measured at 730 nm and  
201 680 nm. To allow for comparison with the existing FastOcean sensor, a third FastBallast sensor was  
202 fitted with the bandpass filter used within FastOcean.

## 203 **2 Materials and methods**

### 204 **2.1 Phytoplankton cultures (N-limited experiments)**

205 Semi-continuous phytoplankton cultures were maintained and adapted to nutrient-replete conditions.  
206 All cultures were grown in *f/2* medium with silicates omitted where appropriate (Guillard, 1975).

207 The experimental work covered a period of several months. The initial work was conducted at the  
208 University of Essex and incorporated six phytoplankton species (Table 1). Cultures were maintained  
209 at 20 °C in a growth room (Sanyo Gallenkamp PLC, UK) and illuminated by horizontal fluorescent  
210 tubes (Sylvania Luxline Plus FHQ49/T5/840, UK). The Light:Dark (L:D) cycle was set at 12 h:12 h.  
211 Neutral density filters were used to generate low light and high light conditions (photon irradiances  
212 of 30 and 300  $\mu\text{mol photons m}^{-2} \text{s}^{-1}$ , respectively). 300 mL culture volumes were maintained within 1  
213 L Duran bottles. Cultures were constantly aerated with ambient air and mixed using magnetic stirrers.

214 Additional experiments, incorporating the remaining five species, were conducted at CTG Ltd (as  
215 before). Cultures were maintained as 30 mL aliquots within filter-capped tissue culture flasks (Fisher  
216 Scientific, UK: 12034917). A growth temperature of 20 °C was maintained by placing the flasks  
217 within a water bath (Grant SUB Aqua Pro 2 L, USA). Low light illumination (photon irradiance of  
218 30  $\mu\text{mol photons m}^{-2} \text{s}^{-1}$ ) was provided from white LED arrays (Optoelectronic Manufacturing  
219 Corporation Ltd. 1ft T5 Daylight, UK). The L:D cycle was set at 12 h:12 h.

220 The N-limited cultures were sub-cultured from the nutrient-replete cultures. High light-grown  
221 cultures were used for the six species interrogated at the University of Essex. In all cases, the growth  
222 photon irradiance of the original culture was maintained after sub-culturing. All N-limited cultures  
223 were grown into the stationary growth phase using N-limiting *f/2* medium before experimental  
224 measurements were made.

### 225 **2.2 Phytoplankton cultures (package effect experiments)**

226 All package effect experiments were conducted at CTG Ltd. Cultures were maintained as 30 mL  
227 aliquots within filter-capped tissue culture flasks (Fisher Scientific, UK: 12034917). A growth  
228 temperature of 20 °C was maintained by placing the flasks within a water bath (Grant SUB Aqua Pro  
229 2 L, USA). Low light illumination (photon irradiance of 30  $\mu\text{mol photons m}^{-2} \text{s}^{-1}$ ) was provided from  
230 white LED arrays (Optoelectronic Manufacturing Corporation Ltd. 1ft T5 Daylight, UK). The L:D  
231 cycle was set at 12 h:12 h.

### 232 **2.3 Setup for OLCs and flash O<sub>2</sub> measurements**

233 All OLCs and flash O<sub>2</sub> measurements were made using an Oxygraph Plus system (Hansatech  
234 Instruments Ltd, Norfolk, UK). The sample volume was always 1.5 mL and a sample temperature of  
235 20 °C was maintained using a circulating water bath connected to the water jacket of the DW1  
236 electrode chamber. The sample was mixed continuously using a magnetic flea (as supplied with the  
237 Oxygraph Plus system). Illumination was provided from an Act2 laboratory system (CTG Ltd, as  
238 before). The source comprised three blue Act2 LED units incorporated within an Act2 Oxygraph  
239 head. Automated control of continuous illumination during OLCs or the delivery of saturating pulses

240 during flash O<sub>2</sub> measurements was provided by an Act2 controller and the supplied Act2Run  
241 software package.

## 242 **2.4 Dilution of samples between flash O<sub>2</sub> and STAF measurements**

243 The N-limited and dual waveband experiments included determination of sample-specific K<sub>a</sub> values.  
244 In all cases, the required dark STAF measurements of F<sub>0</sub> and σ<sub>PII</sub> were made after the flash O<sub>2</sub>  
245 measurements. In all cases, filtered medium was used to dilute the sample between Oxygraph and  
246 STAF measurements.

## 247 **2.5 Chlorophyll *a* extraction**

248 In all cases, the concentrated sample used for flash O<sub>2</sub> or OLCs was normalized to the parallel dilute  
249 STAF sample used to generate F<sub>0</sub> and σ<sub>PII</sub> or FLC data through direct measurement of chlorophyll *a*  
250 concentration from both samples.

251 Chlorophyll was quantified by pipetting 0.5 mL of each sample into 4.5 mL of 90% acetone and  
252 extracting overnight in a freezer at -20 °C (Welschmeyer, 1994). Samples were re-suspended and  
253 centrifuged at approximately 12,000 x g for 10 minutes and left in the dark (~ 30 minutes) to  
254 equilibrate to ambient temperature. Raw fluorescence from a 2 mL aliquot was measured using a  
255 Trilogy laboratory fluorometer (Turner, UK). The chlorophyll *a* concentration was then calculated  
256 from a standard curve.

## 257 **2.6 Setup for dark STAF measurements and FLCs (N-limited experiments)**

258 All STAF measurements for the N-limited experiments were made using a FastOcean sensor in  
259 combination with an Act2 laboratory add-on (CTG Ltd, as before). The Act2 FLC head was  
260 populated with blue LEDs. A water bath was used as a source for the FLC head water jacket,  
261 maintaining the sample temperature at 20 °C.

## 262 **2.7 Flash O<sub>2</sub> measurements for determining sample-specific K<sub>a</sub> values**

263 The density of photochemically active PSII complexes within each sample was determined using the  
264 flash O<sub>2</sub> method (Mauzerall & Greenbaum, 1989; Suggett et al., 2003; Silsbe et al. 2015). The  
265 standard flash used was 120 μs duration on a 24 ms pitch at a photon irradiance of 22,000 μmol  
266 photons m<sup>-2</sup> s<sup>-1</sup>.

267 The concentration of photochemically active PSII centers is proportional to the product of gross O<sub>2</sub>  
268 evolution rates (E<sub>0</sub>) and the reciprocal of flash frequency (Hz). The basic theoretical assumptions are  
269 that all photochemically active PSII centers undergo stable charge separation once during each flash,  
270 that all photochemically active PSII centers re-open before the next flash and that four stable charge  
271 separation events are required for each O<sub>2</sub> released. In reality, small errors are introduced because  
272 some centers do not undergo stable charge separation with each flash (misses) while some centers  
273 will undergo more than one stable charge separation event with each flash (multiple hits).

274 The following checks were applied with all samples:

- 275 • The proportion of PSII centers closed during each flash was verified by comparison with  
276 sequences of 120 μs flashes on a 24 ms pitch at a photon irradiance of 13,800 μmol photons  
277 m<sup>-2</sup> s<sup>-1</sup>

- 278 • The default flash pitch of 24 ms was compared against 16 ms and 36 ms to assess the  
279 accumulation of closed PSII centers, with 120  $\mu\text{s}$  flashes of 22,000  $\mu\text{mol photons m}^{-2} \text{s}^{-1}$   
280 being applied in all three cases  
281 • Sequences of 180 and 240  $\mu\text{s}$  flashes on a 24 ms pitch at a photon irradiance of 22,000  $\mu\text{mol}$   
282  $\text{photons m}^{-2} \text{s}^{-1}$  were applied to assess multiple hits

283 In all cases, a flash duration of 120  $\mu\text{s}$  duration at a photon irradiance of 22,000  $\mu\text{mol photons m}^{-2} \text{s}^{-1}$   
284 on a 24 ms pitch provided more than 96% saturation, with no evidence of a significant level of  
285 multiple hits or the accumulation of closed PSII centers.

## 286 **2.8 Parallel OLC and FLC measurements (N-limited experiments)**

287 A series of parallel replicate OLC/FLC measurements were made on all nutrient-replete cultures, as  
288 well as for the N-limited *T. weissflogii* culture (Table 1). The 10 to 12 light steps were identical  
289 between the parallel OLC and FLC measurements. The sequences always started with a dark step,  
290 with all subsequent steps lasting 180 s. Additional dark steps were incorporated after every third light  
291 step. The dark respiration rate ( $R_d$ ) was assessed before, during and after the OLC. The  $R_d$  values  
292 measured during and after the OLC were always within 8% of the initial  $R_d$  ( $n = 65$ ). The FastOcean  
293 ST sequence comprised 100 flashlets on a 2  $\mu\text{s}$  pitch. Each acquisition was an average of 16  
294 sequences on a 100 ms pitch. The auto-LED and auto-PMT functions incorporated within the  
295 Act2Run software were always active.

296 The reported gross  $\text{O}_2$  evolution rates ( $E_0$ ) were taken as the sum of measured net  $\text{O}_2$  evolution ( $P_n$ )  
297 and  $R_d$  (Equation 9).

298  $E_0 = P_n + R_d$  Equation 9

## 299 **2.9 OLC and FLC curve fits (N-limited experiments)**

300 OLCs and FLCs are variants of the widely used P-E (photosynthesis – photon irradiance) curve. For  
301 OLCs, the metric for photosynthesis is the rate at which  $\text{O}_2$  is evolved through water oxidation by  
302 PSII. For FLCs, the metric for photosynthesis is the relative rate of PSII photochemistry, which is  
303 assessed as the product of  $\phi_{\text{PSII}}$  and E. In the absence of baseline fluorescence (when  $F_b = 0$ ), the  
304 parameter  $F_q'/F_m'$  can be used to provide an estimate of  $\phi_{\text{PSII}}$ . It follows that FLC curves can be  
305 generated by plotting E against the product of baseline-corrected  $F_q'/F_m'$  ( $F_q'/F_{m'c}$ ) and E.

306 There are three basic parameters derived from all P-E curve fits:  $\alpha$ ,  $E_k$  and  $P_m$ . The value of  $\alpha$   
307 provides the initial slope of the relationship between E and P.  $E_k$  is an inflection point along the P-E  
308 curve which is often described as the light saturation parameter (Platt and Gallegos, 1980).  $P_m$  is the  
309 maximum rate of photosynthesis.

310 The FLC curve fits within this study were generated by the Act2Run software (CTG Ltd, as before).  
311 The curve fitting routine within Act2Run is a two-step process which takes advantage of the fact that  
312 the signal to noise within FLC data is highest during the initial part of the FLC curve. In the first step  
313 (the Alpha phase), Equation 10 is used to generate values for  $\alpha$  and  $E_k$  (Webb et al. 1974; Silsbe and  
314 Kromkamp, 2012). The overall fit is an iterative process that minimizes the sum of squares of the  
315 difference between observed and fit values. During the Alpha fit, a significant weighting on the initial  
316 points (low actinic E values) is generated by multiplying each square of the difference by  $(F_q'/F_{m'c})^2$ .  
317 This approach normally generates a good fit up to  $E_k$ , but overshoots beyond this point.  
318 Consequently, the  $P_m$  values generated by the Alpha phase are generally too high.



319 
$$\frac{F_{q'}}{F_{m'}} = \alpha \cdot E_k \cdot (1 - e^{-E/E_k}) \cdot E^{-1} \quad \text{Equation 10}$$

320 In the second step (the Beta phase) Equation 11 is used to improve the value of  $P_m$ . This step includes  
321 a second exponential which is only applied to data points at E values above the  $E_k$  value generated by  
322 the Alpha phase. The sum of squares of the difference between observed and fit values is not  
323 weighted during the Beta phase. This approach forces  $\phi_{PII}$  at  $E_k$  to be 63.2% of  $\alpha$ .

324 
$$\frac{F_{q'}}{F_{m'}} = \alpha \cdot E_k \cdot (1 - e^{-E/E_k}) \cdot E^{-1} \quad \text{Equation 11}$$

325 The signal to noise for OLC data tends to increase with E (the opposite of what happens with FLC  
326 data). Consequently, the fitting method used for the FLC data is not appropriate for OLC data as it is  
327 highly dependent on having a good signal to noise during the early part of the curve. The iterative  
328 OLC data fits used Equations 12 and 13 (Platt and Gallegos, 1980).

329 
$$P = P_s \cdot (1 - e^{(-\alpha \cdot E/P_s)}) \cdot (e^{(-\beta \cdot E/P_s)}) \quad \text{Equation 12}$$

330 
$$P_m = P_s \cdot \left(\frac{\alpha}{\alpha+\beta}\right) \cdot \left(\frac{\beta}{\alpha+\beta}\right)^{\left(\frac{\beta}{\alpha}\right)} \quad \text{Equation 13}$$

331 Within these equations,  $P_s$  and  $\beta$  improve some fits by incorporating a phase that accounts for  
332 possible photoinactivation of PSII complexes and/or supra-optimal levels of PSII downregulation  
333 (photoinhibition).

334 Direct comparison of  $\alpha$  and  $\beta$  between the FLC and OLC is problematic because while  $\alpha$  is  
335 incorporated through the entire curve for both fits,  $\beta$  is only incorporated beyond  $E_k$  for the FLC and  
336 through the entire curve for the OLC. For this reason, direct comparison between FLC and OLC data  
337 was focused on  $P_m$  values.

## 338 **2.10 Setup for the package effect STAF measurements**

339 STAF measurements were made using three FastBallast sensors (CTG Ltd, as before). Each sensor  
340 was fitted with one of the following bandpass filters:

341 730 nm bandpass, 10 nm FWHM (Edmund Optics, UK; part number 65-176)

342 680 nm bandpass, 10 nm FWHM (Edmund Optics, UK; part number 88-571)

343 682 nm bandpass, 30 nm FWHM (HORIBA Scientific, UK; part number 682AF30)

344 Where FWHM is Full Width at Half Maximum. The FastBallast units fitted with filters A, B and C  
345 are, hereafter, termed B730, B680 and B682, respectively. Filter C is the standard bandpass filter  
346 fitted within FastOcean and FastBallast fluorometers and was included here for comparison.

347 The emission peak for PSII fluorescence is centered at 683 nm and is Stokes shifted from a strong  
348 absorption peak centered at 680 nm. Consequently, reabsorption of PSII fluorescence defined by  
349 B680 is close to maximal and is also very high when PSII fluorescence is defined by B682. In  
350 contrast, reabsorption of PSII fluorescence within the waveband defined by B730 is minimal.

351 Because the FastBallast sensor does not incorporate a water jacket, all measurements were made in a  
352 temperature-controlled room at 20 °C. The FastBallast units were always switched on immediately  
353 before each test and automatically powered down once a test had finished. This procedure prevented  
354 any measurable increase in temperature within the FastBallast sample chamber during testing.

355 Calibration of FastBallast units does not include as assessment of ELED (Equation 4). Consequently,  
356 there is no instrument-type specific  $K_a$  available for FastBallast. To get around this limitation, the  
357 LED output was maintained at a constant level for all measurements. This allowed Equation 16 to be  
358 used in place of Equation 4.

$$359 \quad K_R = [\text{PSII}] \cdot \frac{J_{\text{PII}}}{F_o} \quad \text{Equation 16}$$

360 Where  $K_R$  is the instrument-specific constant defined by Oxborough et al. (2012) with units of  
361 photons  $\text{m}^{-3} \text{s}^{-1}$  and  $J_{\text{PII}}$  is the initial rate of PSII photochemical flux during a STAF pulse, with units  
362 of electrons  $\text{PSII}^{-1} \text{s}^{-1}$ . As before, it is assumed that each photon used to drive PSII photochemistry  
363 results in the transfer of one electron.

364 Samples used for the FastBallast STAF measurements were prepared by diluting a small aliquot from  
365 the sample used for the associated flash  $\text{O}_2$  measurement. 60 mL of cell suspension was prepared and  
366 divided equally among the three FastBallast sample chambers. Samples were dark-adapted for at  
367 least five minutes before measurements were made.

368 Each sample was run through the three FastBallast units simultaneously using the FaBtest software  
369 supplied with the FastBallast fluorometer (CTG Ltd, as before). This test involves continuous  
370 application of 400  $\mu\text{s}$  saturating pulses at 10 Hz to a slowly stirred 20 mL sample for eight minutes.  
371 Only 0.5 mL of the sample is illuminated by the saturating pulse at any point in time. Stirring the  
372 sample ensures that the entire sample is interrogated during the test and prevents the accumulation of  
373 closed PSII reaction centers. The mean value of  $F_v$  was extracted from each test result.

374 Following the initial measurement, a spike of Basic Blue 3 (BB3) was added to each sample to  
375 increase the extracellular baseline fluorescence. BB3 is a water-soluble fluorescent dye, which  
376 absorbs throughout the visible range and has a broad emission spectrum centered at approximately  
377 690 nm (Sigma Aldrich, Saint Louis, MA, USA). As such, it can be used to simulate non-variable  
378 fluorescence emission from any source, including CDOM and free chlorophyll a. The BB3 was  
379 dissolved in MilliQ water to a final concentration of 118  $\mu\text{M}$ . The volume of the BB3 spike was  
380 never more than 30  $\mu\text{L}$  within each 20 mL sample. After spiking with BB3, each sample was dark-  
381 adapted for five minutes followed by a second test. In all cases, the  $F_b$  generated by addition of BB3  
382 was at least three times the value of the original  $F_v$  and, consequently, decreased  $F_v/F_m$  by  
383 approximately 65%.

## 384 **2.11 Terminology**

385 A structured approach has been taken in derivation of the parameters used within this manuscript. As  
386 baseline fluorescence is central to this study, new fluorescence terms to describe baseline-corrected  
387 values of existing fluorescence terms have been introduced. Otherwise, the parameters are structured  
388 around root terms that are widely used within the fluorescence community.

389 Table T1 provides terms used to describe the fluorescence signal at any point. Table T2 provides  
390 commonly used parameters derived from the terms in Table T1. Tables T3, T4 and T5 show the

391 derivation of terms used for the yields, rate constants, absorption cross sections and absorption  
392 coefficients applied to PSII energy conversion processes. The remaining terms used are covered  
393 within Table T6.

394 The root terms and subscripts provided in Tables T3 and T4, respectively, are very widely used  
395 (examples include Butler and Kitajima, 1975; Kolber et al. 1998; Baker and Oxborough, 2004; and  
396 Oxborough et al. 2012). These tables were constructed to introduce consistency and minimize  
397 ambiguity: particularly with the distinction between absorption cross-sections and absorption  
398 coefficients. It should also be noted that the 'optical absorption cross-section of PSII' and 'effective  
399 absorption cross-section of PSII' (both unit area per photon) employed by Kolber et al. (1998) are, in  
400 terms of usage, equivalent to the absorption cross-sections of PSII light harvesting and PSII  
401 photochemistry (both unit area per PSII), respectively.

## 402 **3 Results**

### 403 **3.1 Sample-specific $K_a$ values under nutrient-replete and N-limited conditions**

404 The sample-specific values of  $K_a$  for all nutrient-replete, low light grown cultures ranged from 7,822  
405  $\text{m}^{-1}$  for *C. vulgaris* to 25,743  $\text{m}^{-1}$  for *T. pseudonana* (Figure 2A). Of the six species grown under both  
406 low and high light, only *D. salina* exhibited a significant difference in the  $K_a$  values between light  
407 treatments (Supplementary Table 1). In all cases, the N-limited sample-specific  $K_a$  values are  
408 significantly lower than for the nutrient-replete samples they were sub-cultured from (Figure 2A).  
409 These lower  $K_a$  values were matched to lower values of  $F_v/F_m$  (Supplementary Table 1).

410 As previously discussed, there are two mechanisms that could cause sub-maximal  $F_v/F_m$  values: dark-  
411 persistent Stern-Volmer quenching and baseline fluorescence. Importantly, the absorption method is  
412 insensitive to Stern-Volmer quenching while baseline fluorescence can introduce a significant error  
413 in the calculation of  $JV_{\text{PSII}}$ . In the context of these tests, the lower values of both sample-specific  $K_a$   
414 and  $F_v/F_m$  values observed within the N-limited cultures, when compared to the nutrient-replete  
415 values, are entirely consistent with a baseline fluorescence-induced error being introduced by, for  
416 example, the accumulation of photoinactivated PSII complexes. To test this possibility, Equation 14  
417 (Oxborough, 2012) was used to derive a theoretical  $F_v/F_{m_c}$  value that could be applied across all N-  
418 limited cultures.

$$419 \quad F_b = F_m - \frac{F_v}{(F_v/F_{m_c})} \quad \text{Equation 14}$$

420 Where  $F_{m_c}$  is the  $F_b$ -corrected value of the measured  $F_m$  (see Terminology). When using this  
421 equation,  $F_m$  and  $F_v$  are measured from the sample and  $F_v/F_{m_c}$  is an assumed baseline corrected value  
422 of  $F_v/F_m$  for the photochemically active PSII complexes within the sample (see Figure 1). The single,  
423 consensus value of  $F_v/F_{m_c}$  used was generated iteratively, by minimizing the total sum of squares for  
424 the differences in sample-specific  $K_a$  values from nutrient-replete cultures and corrected N-limited  
425 cultures.

426 Applying an  $F_b$ -correction within Equation 14 brings the N-limited sample-specific  $K_a$  values for all  
427 but one species (*T. pseudonana*) up to the point where they are not significantly different from the  
428 matched nutrient-replete culture values and resulted in a consensus  $F_v/F_{m_c}$  value of 0.518. Even with  
429 *T. pseudonana*, the  $F_b$ -corrected value is much closer to the nutrient-replete value than is the  
430 uncorrected N-limited value. The observation that the consensus  $F_v/F_{m_c}$  value required for the  $F_b$ -  
431 corrected values is slightly lower than most of the  $F_v/F_m$  values measured from the nutrient-replete

432 cultures (see Supplementary Table 1) may indicate that the photochemically active PSII complexes  
433 within the N-limited cultures are operating at a slightly lower efficiency than the photochemically  
434 active PSII complexes within the nutrient-replete cultures.

435 The dashed line within Figure 2A shows the default  $K_a$  value of  $11,800 \text{ m}^{-1}$  that is currently provided  
436 for the FastOcean sensor (hereafter,  $K_a^{\text{FO}}$ ). Although this value falls within the mid-range of  $K_a$   
437 values for the nutrient-replete cultures, there is considerable variability around this default value; for  
438 example,  $K_a^{\text{FO}}$  is approximately 50% higher than the nutrient-replete, sample-specific  $K_a$  value for *C.*  
439 *vulgaris* and less than 50% of the equivalent value for *T. pseudonana*.

### 440 3.2 Interspecific variability in $K_a$ and Chl PSII<sup>-1</sup>

441 A comparison between  $n_{\text{PSII}}$  and  $K_a$  is valid because they have a similar proportional impact in the  
442 calculation of [PSII] within Equations 2 and 4, respectively. Part B of Figure 2 shows  $n_{\text{PSII}}$  values for  
443 nutrient-replete cultures and N-limited cultures. The dashed line is at a widely used default value for  
444  $n_{\text{PSII}}$  of 0.002 Chl PSII<sup>-1</sup> (Kolber & Falkowski 1993; Suggett et al. 2001). There are two noteworthy  
445 features within this dataset. Firstly, the range of  $n_{\text{PSII}}$  values is very wide, at around 15:1: from less  
446 than 0.0002 Chl PSII<sup>-1</sup> for the N-limited *T. pseudonana* to more than 0.003 Chl PSII<sup>-1</sup> for N-limited  
447 *E. huxleyi*. Secondly, there is a lack of consistency between  $n_{\text{PSII}}$  values from nutrient-replete  
448 cultures and N-limited cultures: five species show higher  $n_{\text{PSII}}$  values for the N-limited cultures while  
449 the remaining six species show lower  $n_{\text{PSII}}$  values for the N-limited cultures. Overall, these data  
450 provide a good illustration of how an assumed value for  $n_{\text{PSII}}$  can introduce large errors in the  
451 calculation of  $JV_{\text{PSII}}$ , which can only be corrected through independent determination of PSII  
452 concentration.

### 453 3.3 Comparison of OLC and FLC curves

454 Figure 3 shows OLC and FLC data from all eleven phytoplankton species used within this study. All  
455 data are from the nutrient-replete, low light-grown cultures. The FLC values of PhytoGO (y-axes)  
456 assume four electrons per  $\text{O}_2$  released. Values from the STAF data were derived using either  $K_a^{\text{FO}}$  or  
457 the sample-specific values shown in Figure 2A. Clearly, in most cases, the match between OLC and  
458 FLC is greatly improved by using the sample-specific values of  $K_a$  in place of  $K_a^{\text{FO}}$ . The one  
459 exception is Figure 3B (*D. salina*) where the sample-specific  $K_a$  value happens to be very close to  
460  $K_a^{\text{FO}}$ .

461 The data presented within Figure 4 have been extracted from the OLCs and FLCs within Figure 3 to  
462 allow bulk comparison of the measured OLC and FLC PhytoGO values (A and C). Also shown is a  
463 comparison of the  $P_m$  values (B and D) from the OLC and FLC curve fits. Values were generated  
464 using either  $K_a^{\text{FO}}$  (A and C) or the sample-specific values of  $K_a$  (B and D).

465 Inevitably, the match between OLC and FLC data is improved significantly when the sample-specific  
466 values of  $K_a$  (C and D) are used in preference to  $K_a^{\text{FO}}$  (A and B). The slope for the sample-specific  $K_a$   
467 data is very close to the 'ideal' of 1.0 and a high proportion of data points fall within the  $\pm 20\%$  lines  
468 included within the plot. In contrast, the  $K_a^{\text{FO}}$  data have a much lower slope of 0.6 and  $\pm 50\%$  lines  
469 are required to constrain a similar proportion of points. The sample-specific  $K_a$  values also generate a  
470 much better correlation between the values of  $P_m$  derived from OLC and FLC curve fits than  $K_a^{\text{FO}}$  (D  
471 and B, respectively). The slope for the sample-specific  $K_a$  data (D), at 0.778, is significantly lower  
472 than the ideal of 1.0. This lower slope may be at least partly due to differences in the curve fits  
473 applied to OLC and FLC data (see Methods).

### 474 3.4 The stability of $F_b$ under actinic light

475 Clearly, the consensus  $F_v/F_{mc}$  (0.518) in Equation 14 generated a good match between  $K_a$  values for  
476 all but one of the nutrient-replete and N-limited cultures in Figure 2A. In a wider context, it could  
477 prove valid to use the consensus  $F_v/F_{mc}$  of 0.518 within Equation 14 when the measured  $F_v/F_m$  is  
478 lower than this value and assume that  $F_b$  is zero when the measured  $F_v/F_m$  is above 0.518.

479 In situations where  $F_b$  is non-zero, the calculated value of  $a_{LHII}$  used within Equation 5 is decreased  
480 while value of  $F_q'/F_m'$  used within the same equation is increased. The adjustment to  $a_{LHII}$  can largely  
481 be justified by the fact that matched  $F_b$  and  $a_{LHII}$  values are derived from the same dark-adapted  
482 STAF measurement. In contrast, the adjustment to  $F_q'/F_m'$  is potentially more complex, simply  
483 because light-dependent NPQ can significantly decrease the maximum fluorescence level between  
484 the dark-adapted  $F_m$  and light-adapted  $F_m'$  (see Introduction). Given that a proportion of  $F_b$  could be  
485 from photoinactivated PSII complexes within the same membranes as the photochemically active  
486 PSII complexes, it seems reasonable to consider the possibility that NPQ could also quench  $F_b$ .

487 To test the potential for a NPQ-dependent decrease in  $F_b$ , additional FLCs were run on the N-limited  
488 cultures of *T. weissflogii* that had been sub-cultured from the low light-grown, nutrient-replete  
489 cultures. The value of  $F_b$  for the original, nutrient-replete cultures was always assumed to be zero,  
490 simply because the measured  $F_v/F_m$  from was always above 0.518. Conversely, the  $F_v/F_m$  values  
491 measured from the N-limited cultures were always well below the consensus value, at  $0.116 \pm 0.006$ .

492 Figure 5A shows the maximum PhytoGO values ( $PhytoGO_m$ ), measured as  $O_2$ -evolution (x-axis) or  
493 calculated using the sample-specific  $K_a$  value from the nutrient-replete *T. weissflogii* of  $15,868 \text{ m}^{-1}$ .  
494 For these values,  $F_b$  was set to zero for both the nutrient-replete cultures and the N-limited cultures.  
495 Clearly, while there is good agreement between the measured and calculated values of  $PhytoGO_m$   
496 from the nutrient-replete cultures, most of the calculated  $PhytoGO_m$  values from the N-limited  
497 cultures are much higher than the measured values.

498 For Figure 5B, Equation 14 was used to generate a consensus  $F_v/F_{mc}$  specific to the N-limited  
499 cultures. This consensus value was reached by minimizing the sum-of-squares for the regression line  
500 through the N-limited data by allowing  $F_b$  to vary. The mean consensus  $F_v/F_{mc}$  from this fit (0.502) is  
501 within 3% of the consensus value derived from the dark-adapted data presented in Figure 2. In  
502 contrast, the average NPQ-dependent decrease from dark-adapted  $F_m$  to the light-adapted  $F_m'$   
503 measured at  $P_m$  was always more than 30% (data not shown). Consequently, these data do not imply  
504 significant quenching of  $F_b$  between the dark-adapted state and  $P_m$ .

### 505 3.5 Dual waveband STAF measurements to correct for the package effect

506 We hypothesized that the variance of sample-specific  $K_a$  values within Figure 2A could be at least  
507 partly due to variable package effect. As previously noted within Materials and methods, three  
508 FastBallast units (B730, B680 and B682) were used to measure fluorescence centered at 730 nm and  
509 680 nm (both 10 nm FWHM) and 682 nm (30 nm FWHM), respectively.

510 To test the viability of a STAF-based approach to quantifying the package effect, we generated ratios  
511 of the  $F_v$  measured by B730 as a proportion of the  $F_v$  measured by B680 ( $F_v^{730/680}$ ) or B683 ( $F_v^{730/683}$ ).  
512 Within Figure 6, these values are plotted against sample-specific values of  $K_R$  (Figure 6A and D,  
513 respectively). The  $F_v$  ratios from Figure 6A and D were used to generate  $F_v$ -derived values of  $K_R$   
514 (Figure 6B and E, respectively).

515      Calculated  $K_R = \frac{F_v^{730/680} - \text{Intercept}}{\text{Slope}}$       Equation 15

516      Equation 15 provides the conversion between A and D. For the equivalent conversion between B and  
517      E,  $F_v^{730/680}$  was replaced with  $F_v^{730/683}$ . Slope and Intercept are the regression line values from A or D,  
518      as appropriate. The calculated  $K_R$  values within C and F were generated by combining the + BB3  
519       $F_v^{730/680}$  and  $F_v^{730/683}$  data with the Slope and Intercept from A and D, as appropriate.

520      One feature that is immediately clear from these data is the much tighter grouping of points along the  
521      regression lines for the  $F_v^{730/680}$  data (A to C) than the  $F_v^{730/683}$  data (D to F). This indicates that the 30  
522      nm FWHM of the 682 nm bandpass filter is too broad to adequately isolate the fluorescence  
523      generated close the 680 nm absorption peak and, consequently, that the 10 nm FWHM 680 nm  
524      bandpass filter is the better choice for these measurements.

525      All 11 species used within the package effect tests were grown under nutrient-replete conditions and  
526      exhibited  $F_v/F_m$  values that were above the consensus value of 0.518 generated from the first part of  
527      this study. The addition of BB3 to each sample within the package effect tests was to simulate the  
528      lower  $F_v/F_m$  values that are frequently observed under conditions of stress. The expectation was that  
529      fluorescence from the added BB3 would increase  $F_b$  but have minimal impact  $F_v$  and, as a  
530      consequence, that the slope of the relationship between calculated and measured  $K_R$  values would not  
531      be significantly affected by a BB3-dependent increase in  $F_b$ . The absence of significant changes in  
532      slope between B and C and E and F are consistent with this expectation.

### 533      **3.6 Discussion**

534      The absorption method described by Oxborough et al. (2012) provides a method for estimating  
535      PhytoGO and PhytoPP on much wider spatiotemporal scales than  $O_2$  evolution or  $^{14}C$  fixation,  
536      respectively, through determination of  $JV_{PII}$ . This study was undertaken to assess the extent to which  
537      baseline fluorescence and the package effect could introduce errors into the calculation of  $JV_{PII}$   
538      (Equation 5).

539      With regard to baseline fluorescence ( $F_b$ ), the underlying question was whether sub-maximal dark-  
540      adapted value of  $F_v/F_m$  could be attributed to  $F_b$  or downregulation of PSII photochemistry by dark-  
541      persistent Stern-Volmer quenching or some combination of the two. The data presented within Figure  
542      2A provides strong evidence that, for the examples presented within this study,  $F_b$  is by far the  
543      dominant contributor to sub-maximal  $F_v/F_m$  values. Although this interpretation may not hold for all  
544      phytoplankton species and environmental conditions, this study provides a straightforward, practical  
545      approach to addressing the question of how universally valid an  $F_b$  correction to low sub-maximal  
546      dark-adapted  $F_v/F_m$  values might be.

547      We conclude that no correction for baseline fluorescence should be applied when the dark-adapted  
548       $F_v/F_m$  is above a certain consensus value. In situations where the dark-adapted  $F_v/F_m$  is below this  
549      consensus value, Equation 14 should be used to calculate a value for  $F_b$ . From the data presented  
550      here, a consensus value ( $F_v/F_{mc}$ ) of between 0.50 and 0.52 seems an appropriate default value.

551      Clearly, the value of  $F_b$  generated by Equation 14 is dependent on a STAF measurement made on a  
552      dark-adapted sample. The data presented in Figure 5 indicate that, for this specific example at least,  
553      the dark-adapted  $F_b$  could be applied at the other end of the FLC scale, to correct the value of  $P_m$ .

554 With regard to the package effect, the wide range of  $K_a$  values within Figure 2A is entirely consistent  
555 with a significant proportion of the fluorescence emitted from functional PSII complexes being  
556 reabsorbed through this process. This interpretation is clearly supported by data presented in Figure  
557 3, where use of the sample-specific  $K_a$  value in place of  $K_a^{FO}$  provides a much stronger match  
558 between the FLC and OLC data. The dual waveband data presented in Figure 6 provide strong  
559 evidence that the package effect-induced error could be decreased significantly through incorporation  
560 of a  $F_v^{730/680}$ -derived correction factor applied to a default instrument-type specific  $K_a$  value such as  
561  $K_a^{FO}$ . From a practical point of view, routine implementation of this correction step will require either  
562 two detectors with different filters or a single detector with switchable filtering. On balance, the latter  
563 option is likely to prove more cost-effective and easier to calibrate.

564 Overall, the conclusions reached can be summarized by Equation 16

565 
$$JV_{PII} = K_a^{TS} \cdot R_{PE} \cdot \frac{F_{mc} - F_{oc}}{F_{mc} \cdot F_{oc}} \cdot \frac{F_{q'}}{F_{mc'}} \cdot E \quad \text{Equation 16}$$

566 where  $K_a^{TS}$  is the instrument type-specific  $K_a$  value and  $R_{PE}$  is a dimensionless sample-specific  
567 correction factor. All other terms are as before or are defined in Terminology.

568 For the species and conditions examined in this paper, the data presented provide strong evidence  
569 that baseline correction and package effect correction can increase the accuracy of estimates of  
570 PhytoGO from STAF. We anticipate that development and deployment of STAF instrumentation that  
571 will allow Equation 16 to be applied will take us significantly closer to achieving the objective of  
572 obtaining reliable autonomous estimates of PhytoGO. Such measurements, if used in conjunction  
573 with simultaneous satellite measurements of ocean color, will likely lead to improved estimates of  
574 local, regional or global pelagic PhytoPP.

### 575 3.7 Acknowledgements

576 The authors wish to thank Tania Cresswell-Maynard, James Fox and Philipp Siegel (University of  
577 Essex, UK) for supplying the phytoplankton cultures. We would also like to thank Hoi Ga Chan  
578 (University of Princeton, US) and Mark Moore and Anna Hickman (Southampton University, UK)  
579 for helpful discussions. RJG acknowledges support from NERC grant NE/P002374/1.

### 580 3.8 Author contributions statement

581 KO conceived of the study and developed the software required to conduct the experiments. The  
582 initial baseline experiments were designed by KO, RG and TB. All of the baseline experiments were  
583 conducted by TB who also processed the primary data. The dual waveband experiments for  
584 assessment of the package effect were conceived of by KO and conducted by TB. Package effect data  
585 were processed by TB and jointly analyzed by KO and TB. Figure 1 was produced by KO, all  
586 remaining Figures were produced by TB. The initial draft of the main text was produced by KO.  
587 Iterations of the manuscript were implemented by KO, TB and RG. The submitted version of the  
588 manuscript is approved for publication by KO, TB and RG.

### 589 3.9 Conflict of interest statement

590 The authors (KO, TB and RG) declare that the research was conducted in the absence of any  
591 commercial or financial relationships that could be construed as a potential conflict of interest.

### 592 3.10 Contribution to the field statement

593 Phytoplankton photosynthesis is responsible for approximately half of the carbon fixed on the planet.  
594 As a process, photosynthesis is responsive to variability in multiple environmental drivers including  
595 light, temperature and nutrients across spatial scales from meters to ocean basins, and time scales  
596 from minutes to tens of years. This poses significant challenges for measurement and monitoring.  
597 While direct measurement of the carbon fixed by photosynthesis can only be applied on very limited  
598 spatial and temporal scales, active chlorophyll fluorescence has enormous potential for the accurate  
599 measurement of phytoplankton photochemistry, which provides the reducing power for carbon  
600 fixation, on much wider spatiotemporal scales and with much lower operational costs. This study  
601 identifies practical measures that can be taken to improve the accuracy of such measurements. We  
602 are confident that these measures will have minimal impact on the frequency at which phytoplankton  
603 photochemistry is assessed and that they will be suitable for application on autonomous measurement  
604 platforms.

### 605 3.11 References

- 606 Baker NR, Oxborough K (2004). Chlorophyll Fluorescence as a Probe of Photosynthetic  
607 Productivity. p. 65-82 In: G. C. Papageorgiou and Govindjee [eds.], Chlorophyll *a* Fluorescence: A  
608 Signature of Photosynthesis. Springer
- 609 Behrenfeld MJ, Prasil O, Babin M, Bruyant F (2004). In search of a physiological basis for  
610 covariations in light-saturated photosynthesis. *Journal of Phycology* 40(1): 4-25
- 611 Berner T, Dubinsky Z, Wyman K, Falkowski PG (1989). Photoadaptation and the “package effect” in  
612 *Dunaliella tertiolecta* (*Chlorophyceae*). *J. Phycol.* 25: 70-78
- 613 Bouman HA et al. (2018). Photosynthesis-irradiance parameters of marine phytoplankton: synthesis  
614 of a global data set. *Earth System Science Data* 10: 251-266 DOI: 10.5194/essd-10-251-2018
- 615 Bricaud A, Morel A, Prieur L (1983). Optical efficiency factors of some phytoplankters. *Limnol.*  
616 *Oceanogr.* 28: 816–832
- 617 Butler WL, Kitajima M. (1975). Fluorescence quenching in photosystem II of chloroplasts.  
618 *Biochimica et Biophysica Acta* 376: 116-125
- 619 Demmig-Adams B, Adams W (2006). Photoprotection in an ecological context: the remarkable  
620 complexity of thermal energy dissipation. *New Phytol* 172: 11–21
- 621 Falkowski PG, LaRoche J (1991). Acclimation to spectral irradiance in algae. *Journal of Phycology*  
622 27: 8-14
- 623 Ferrón S, del Valle A, Björkman KM, Church MJ, Karl DM (2016). Application of membrane inlet  
624 mass spectrometry to measure aquatic gross primary production by the <sup>18</sup>O *in vitro* method.  
625 *Limnology and Oceanography* 14: 610-622
- 626 Geider RJ, MacIntyre HL. (2002). Physiology and biochemistry of photosynthesis and algal carbon  
627 acquisition. *Phytoplankton productivity: Carbon assimilation in marine and freshwater ecosystems:*  
628 44-77



- 629 Goss R, Jakob T (2010). Regulation and function of xanthophyll cycle-dependent photoprotection in  
630 algae. *Photosynth Res* 106: 103–122
- 631 Guillard RR (1975). Culture of phytoplankton for feeding marine invertebrates. *Culture of Marine*  
632 *Invertebrate Animals*: Springer, 29-60
- 633 Halsey KH, Milligan AJ, Behrenfeld MJ (2010). Physiological optimization underlies growth rate-  
634 independent chlorophyll-specific gross and net primary production. *Photosynthesis research* 103(2):  
635 125-137
- 636 Kolber Z, Falkowski PG (1993). Use of active fluorescence to estimate phytoplankton photosynthesis  
637 in situ. *Limnology and Oceanography* 38(8): 1646-1665
- 638 Kolber ZS, Prášil O, Falkowski PG (1998). Measurements of variable chlorophyll fluorescence using  
639 fast repetition rate techniques: defining methodology and experimental protocols. *Biochimica et*  
640 *Biophysica Acta (BBA)-Bioenergetics* 1367(1): 88-106
- 641 Krause GH, Jahns P (2004). Non-photochemical energy dissipation determined by chlorophyll  
642 fluorescence quenching: characterization and function, p. 463-495. In G. C. Papageorgiou and  
643 Govindjee [eds.], *Chlorophyll a fluorescence: A signature of photosynthesis*. Springer
- 644 Lawrenz E, Silsbe G, Capuzzo E, Ylöstalo P, Forster RM, Simis SG, Prášil O, Kromkamp JC,  
645 Hickman AE, Moore CM (2013). Predicting the electron requirement for carbon fixation in seas and  
646 oceans. *PLoS One* 8(3): e58137
- 647 Marra J (2002). Approaches to the measurement of plankton production. In: Williams, PJLB,  
648 Thomas, DN and Reynolds CS (eds), *Phytoplankton Productivity*. Blackwell Science Ltd, Oxford,  
649 pp. 78–108
- 650 Mauzerall D, Greenbaum NL (1989). The absolute size of a photosynthetic unit. *Biochimica et*  
651 *Biophysica Acta (BBA)-Bioenergetics* 974(2): 119-140
- 652 Milligan AJ, Halsey, KH, Behrenfeld MJ (2015). Advancing interpretations of <sup>14</sup>C-uptake  
653 measurements in the context of phytoplankton physiology and ecology. *Journal of Plankton*  
654 *Research*: 37(4): 692–698
- 655 Montagnes DJS, Berges JA, Harrison PJ, Taylor FJR (1994). Estimating carbon, nitrogen, protein,  
656 and chlorophyll a from volume in marine phytoplankton. *Limnology and Oceanography* 39(5) 1044-  
657 1060
- 658 Moore CM, Mills MM, Milne A, Langlois R, Achterberg EP, Lochte K, Geider RJ, La Roche J  
659 (2006). Iron limits primary productivity during spring bloom development in the central North  
660 Atlantic. *Global Change Biology* 12(4): 626-634
- 661 Morel A, Bricaud A (1981). Theoretical results concerning light absorption in a discrete medium, and  
662 application to specific absorption of phytoplankton. *Deep-Sea Research* 28A: 1375-1393

- 663 Olaizola M, Yamamoto HY (1994). Short-term response of the diadinoxanthin cycle and  
664 fluorescence yield to high irradiance in *Chaetocerus muelleri* (Bacillariophyceae). *Journal of*  
665 *Phycology* 30: 606–612
- 666 Oxborough K, Moore CM, Suggett DJ, Lawson T, Chan HG, Geider RJ. (2012). Direct estimation of  
667 functional PSII reaction center concentration and PSII electron flux on a volume basis: a new  
668 approach to the analysis of Fast Repetition Rate fluorometry (FRRf) data. *Limnology and*  
669 *Oceanography: Methods* 10(3): 142-154
- 670 Platt T, Gallegos CL. (1980). Modelling primary production. Primary productivity in the sea:  
671 Springer, 339-362
- 672 Quay PD, Peacock C, Björkman K, Karl DM (2010). Measuring primary production rates in the  
673 ocean: Enigmatic results between incubation and non-incubation methods at Station ALOHA, Global  
674 Biogeo-chem. Cycles 24 GB3014 doi:10.1029/2009GB003665
- 675 Silsbe GM, Kromkamp JC (2012). Modeling the irradiance dependency of the quantum efficiency of  
676 photosynthesis. *Limnology and Oceanography: Methods* 10: 645 - 652
- 677 Silsbe GM, Oxborough K, Suggett DJ, Forster RM, Ihnken S, Komárek O, Lawrenz E, Prášil O,  
678 Röttgers R, Šicner M (2015). Toward autonomous measurements of photosynthetic electron transport  
679 rates: An evaluation of active fluorescence-based measurements of photochemistry. *Limnology and*  
680 *Oceanography: Methods* 13(3): 138-155
- 681 Suggett D, Kraay G, Holligan P, Davey M, Aiken J, Geider R (2001). Assessment of photosynthesis  
682 in a spring cyanobacterial bloom by use of a fast repetition rate fluorometer. *Limnology and*  
683 *Oceanography* 46(4): 802-810
- 684 Suggett DJ, Maberly SC, Geider RJ (2006). Gross photosynthesis and lake community metabolism  
685 during the spring phytoplankton bloom. *Limnology and Oceanography* 51(5): 2064-2076
- 686 Suggett DJ, MacIntyre HL, Geider RJ (2004). Evaluation of biophysical and optical determinations  
687 of light absorption by photosystem II in phytoplankton. *Limnology and Oceanography: Methods* 2:  
688 316-332
- 689 Suggett DJ, Moore CM, Geider RJ (2010). Estimating aquatic productivity from active fluorescence  
690 measurements. *Chlorophyll a fluorescence in aquatic sciences: methods and applications: Springer,*  
691 103-127
- 692 Suggett DJ, Oxborough K, Baker NR, MacIntyre HL, Kana TM, Geider RJ (2003). Fast repetition  
693 rate and pulse amplitude modulation chlorophyll *a* fluorescence measurements for assessment of  
694 photosynthetic electron transport in marine phytoplankton. *European Journal of Phycology* 38(4):  
695 371-384
- 696 Webb WL, Newton M, Starr D (1974). Carbon dioxide exchange of *Alnus rubra*. *Oecologia* 17(4):  
697 281-291

698 Welschmeyer NA (1994). Fluorometric analysis of chlorophyll *a* in the presence of chlorophyll *b* and  
699 pheopigments. *Limnology and Oceanography* 39(8): 1985-1992

700 Table 1. List of cultures used within each experiment. H = High Light, L = Low Light, N = N-limited.  
 701 UoE = University of Essex. (\* = simultaneous N-limited OLC/FLC measurements made on *T.*  
 702 *weissflogii* cultures ( $n = 10$ ).

| Algal species<br>(Symbol used within figures)            | Clone           | Site(s)     | Media        | F <sub>b</sub>       |   |   |            | Package effect                |
|----------------------------------------------------------|-----------------|-------------|--------------|----------------------|---|---|------------|-------------------------------|
|                                                          |                 |             |              | Flash O <sub>2</sub> |   |   | OLC<br>FLC | STAF/<br>flash O <sub>2</sub> |
|                                                          |                 |             |              | H                    | L | N |            |                               |
| <i>Calcidiscus leptoporus</i><br>( <i>C. l</i> )         | RCC1159         | CTG         | f/2          | -                    | - | - | -          | 4                             |
| <i>Chlorella vulgaris</i><br>( <i>C. v</i> )             | CCAP211<br>/12  | CTG         | BG11         | -                    | 8 | 4 | 5          | 4                             |
| <i>Coccolithus pelagicus</i><br>( <i>C. p</i> )          | PCC182          | CTG         | f/2<br>(+Si) | -                    | 8 | 4 | 5          | -                             |
| <i>Coscinodiscus granii</i><br>( <i>C. g</i> )           | CCAP1013<br>/10 | CTG         | f/2<br>(+Si) | -                    | - | - | -          | 4                             |
| <i>Coscinodiscus</i> sp.<br>( <i>C. sp.</i> )            | CCAP1013<br>/11 | CTG         | f/2<br>(+Si) | -                    | - | - | -          | 4                             |
| <i>Dunaliella salina</i><br>( <i>D. s</i> )              | CCAP19<br>/18   | UoE<br>CTG  | f/2          | 8                    | 2 | 4 | 5          | -                             |
| <i>Dunaliella tertiolecta</i><br>( <i>D. t</i> )         | CCAP1320        | UoE<br>CTG  | f/2          | 6                    | 2 | 4 | 5          | 4                             |
| <i>Emiliana huxleyi</i><br>( <i>E. h</i> )               | CCMP1516        | UoE<br>CTG  | f/2          | 8                    | 2 | 4 | 5          | 4                             |
| <i>Isochrysis galbana</i><br>( <i>I. g</i> )             | CCMP1323        | CTG         | f/2          | -                    | 8 | 4 | 5          | 4                             |
| <i>Pseudo-nitzschia fraudulenta</i><br>( <i>P-n. f</i> ) | CCAP1061<br>/46 | CTG         | f/2<br>(+Si) | -                    | - | - | -          | 4                             |
| <i>Pycnococcus provasolii</i><br>( <i>P. p</i> )         | CCMP1199        | CTG         | f/2          | -                    | 8 | 4 | 5          | 4                             |
| <i>Phaeodactylum tricornerutum</i><br>( <i>P. t</i> )    | CCMP2561        | UoE<br>CTG  | f/2<br>(+Si) | 8                    | 2 | 4 | 5          | 4                             |
| <i>Thalassiosira pseudonana</i><br>( <i>T. p</i> )       | CCMP1335        | CTG         | f/2<br>(+Si) | -                    | 8 | 4 | 5          | -                             |
| <i>Thalassiosira punctigera</i><br>( <i>C. p</i> )       | CCAP1085<br>/19 | UoE<br>CTG  | f/2<br>(+Si) | 8                    | 2 | 4 | 5          | -                             |
| <i>Thalassiosira rotula</i><br>( <i>T. r</i> )           | CCAP1085<br>/20 | CTG         | f/2<br>(+Si) | -                    | - | - | -          | 4                             |
| <i>Thalassiosira weissflogii</i><br>( <i>T. w</i> )      | CCMP1051        | UoE/<br>CTG | f/2<br>(+Si) | 8                    | 2 | 4 | 5<br>(10*) | -                             |

703

704 Table 2. The maximum phytoplankton gross photosynthesis rates (PhytoGO<sub>m</sub>) from simultaneous OLC  
 705 and FLC measurements of the 11 nutrient-replete phytoplankton cultures measured in Experiment 1.  
 706 PhytoGO from the FLC data was calculated using  $K_a^{FO}$  (11,800 m<sup>-1</sup>) and a sample-specific ( $K_a^S$ ) values.  
 707 Differences between OLC and FLC data was tested by a series of parametric One-Way ANOVA tests  
 708 with a post hoc Tukey test (One-way ANOVA, Tukey post hoc test;  $P < 0.05$ ). Letters show the  
 709 significant differences between the maximum gross photosynthesis rate (PhytoGP<sub>m</sub>) (O<sub>2</sub> RCII<sup>-1</sup> s<sup>-1</sup>);  
 710 where [B] is significantly greater than [A], and [C] is significantly greater than [A] and [B].  
 711

| Algal Species         | OLC        |     | $K_a^{FO}$ |     | $K_a^S$    |     |
|-----------------------|------------|-----|------------|-----|------------|-----|
| <i>C. vulgaris</i>    | 17.9 (1.4) |     | 28.0 (3.6) |     | 18.6 (2.4) |     |
| <i>C. pelagicus</i>   | 50.6 (2.6) | [B] | 24.6 (2.5) | [A] | 41.4 (4.3) | [B] |
| <i>D. salina</i>      | 20.3 (1.1) | [B] | 16.2 (0.4) | [A] | 16.6 (0.5) | [A] |
| <i>D. tertiolecta</i> | 49.3 (2.0) | [B] | 37.2 (1.9) | [A] | 48.7 (2.4) | [B] |
| <i>E. huxleyi</i>     | 19.4 (2.1) | [B] | 9.4 (1.1)  | [A] | 16.5 (2.0) | [B] |
| <i>I. galbana</i>     | 28.6 (0.8) | [B] | 20.6 (0.4) | [A] | 27.3 (0.5) | [B] |
| <i>P. provasolii</i>  | 28.6 (2.2) |     | 25.4 (2.5) |     | 30.2 (2.9) |     |
| <i>P. tricorutum</i>  | 25.5 (0.6) | [B] | 15.6 (0.4) | [A] | 28.9 (0.7) | [C] |
| <i>T. pseudonana</i>  | 29.1 (2.2) | [B] | 13.0 (0.9) | [A] | 28.3 (2.1) | [B] |
| <i>T. punctigera</i>  | 34.1 (2.2) | [B] | 16.7 (1.1) | [A] | 30.9 (2.1) | [B] |
| <i>T. weissflogii</i> | 44.8 (4.7) | [B] | 27.5 (1.2) | [A] | 37.0 (1.6) |     |

712

713 Table T1. The o, m and v subscripts define the origin (of variable fluorescence), maximum  
 714 fluorescence and variable fluorescence, respectively. The q subscript defines the proportion of  
 715 variable fluorescence that is quenched by PSII photochemistry. The b subscript defines baseline  
 716 fluorescence, which is assumed to contribute equally to  $F_o$ ,  $F_m$  and  $F$ . In the interest of readability,  
 717 only dark-adapted values have been included in the Measurement or derivation column.

| <b>Dark term</b> | <b>Light term</b> | <b>Measurement or derivation</b>                                                                    |
|------------------|-------------------|-----------------------------------------------------------------------------------------------------|
| $F_o$            | $F_o'$            | Extrapolation to $t = 0$ from a ST pulse                                                            |
| $F_m$            | $F_m'$            | At the asymptote of a ST pulse                                                                      |
| $F_v$            | $F_v'$            | $F_m - F_o$                                                                                         |
| $F$              | $F'$              | Any point between $F_o$ and $F_m$                                                                   |
| $F_q$            | $F_q'$            | $F_m - F$                                                                                           |
| $F_b$            | $F_b'$            | Fluorescence signal not attributable to functional PSII centers                                     |
| $F_b$            | $F_b'$            | Proportion of the measured $F_o$ that does not arise from functional PSII centers in the open state |
| $F_{oc}$         | $F_{oc}'$         | The baseline subtracted value of $F_o$ such that $F_{oc} = F_o - F_b$                               |
| $F_{mc}$         | $F_{mc}'$         | The baseline subtracted value of $F_m$ such that $F_{mc} = F_m - F_b$                               |
| $F_c$            | $F_c'$            | The baseline subtracted value of $F$ such that $F_c = F - F_b$                                      |

718 Table T2. Fluorescence parameters derived using the terms within Table T1.  
 719

| <b>Dark parameter</b> | <b>Light parameter</b> | <b>Interpretation</b>                                                                                                                         |
|-----------------------|------------------------|-----------------------------------------------------------------------------------------------------------------------------------------------|
| $F_v/F_m$             | $F_v'/F_m'$            | Provides an estimate of PSII photochemical efficiency ( $\phi_{PII}$ ) when all PSII centers are in the open state and $F_b = 0$              |
| $F_v/F_{mc}$          | $F_v'/F_{mc}'$         | Provides a baseline-corrected estimate of PSII photochemical efficiency ( $\phi_{PII}$ ) when all PSII centers are in the open state          |
| $F_q/F_m$             | $F_q'/F_m'$            | Provides an estimate of PSII photochemical efficiency ( $\phi_{PII}$ ) when some centers are closed and $F_b = 0$                             |
| $F_q/F_{mc}$          | $F_q'/F_{mc}'$         | Provides a baseline-corrected estimate of PSII photochemical efficiency ( $\phi_{PII}$ ) when some centers are closed                         |
| $F_q/F_v$             | $F_q'/F_v'$            | Provides a value for the PSII photochemical factor                                                                                            |
| $F_o/F_v$             | $F_o'/F_v'$            | Provides an estimate of Stern-Volmer quenching within the PSII pigment matrix, normalized to PSII photochemistry (only valid when $F_b = 0$ ) |
| $F_{oc}/F_v$          | $F_{oc}'/F_v'$         | Provides a baseline-corrected estimate of Stern-Volmer quenching within the PSII pigment matrix, normalized to PSII photochemistry            |

720  
 721

722 Table T3. Root terms used in the derivation of parameter 'x' within Table T5.

| Term       | Meaning                  | Units                              |
|------------|--------------------------|------------------------------------|
| $\phi_x$   | Yield                    | dimensionless                      |
| $k_x$      | Rate constant            | photons s <sup>-1</sup>            |
| $\sigma_x$ | Absorption cross-section | m <sup>-2</sup> PSII <sup>-1</sup> |
| $a_x$      | Absorption coefficient   | m <sup>-1</sup>                    |

723

724 Table T4. Subscripts used for derivation of parameters within Table T5.

| Term | Usage                 |
|------|-----------------------|
| II   | Photosystem II (PSII) |
| LH   | Light-harvesting      |
| P    | Photochemistry        |
| F    | Fluorescence          |
| D    | Non-radiative decay   |

725

726 Table T5. Parameters derived from the root terms and subscripts within Tables T3 and T4, respectively.  
727 Empty fields within the Light term column indicate an assumed lack of change for these quantities  
728 between the dark and light-adapted states.

| Dark term              | Light term             | Definition                                         | SI units                          |
|------------------------|------------------------|----------------------------------------------------|-----------------------------------|
| $\phi_{\text{PII}}$    | $\phi_{\text{PII}}'$   | Yield of PSII photochemistry                       | dimensionless                     |
| $\phi_{\text{FII}}$    | $\phi_{\text{FII}}'$   | Yield of PSII fluorescence                         | dimensionless                     |
| $\phi_{\text{DII}}$    | $\phi_{\text{DII}}'$   | Yield of non-radiative decay within PSII           | dimensionless                     |
| $k_{\text{PII}}$       |                        | Rate constant for photochemistry at PSII           | photons s <sup>-1</sup>           |
| $k_{\text{FII}}$       |                        | Rate constant for fluorescence emission from PSII  | photons s <sup>-1</sup>           |
| $k_{\text{DII}}$       | $k_{\text{DII}}'$      | Rate constant for non-radiative decay within PSII  | photons s <sup>-1</sup>           |
| $\sigma_{\text{LHII}}$ |                        | Absorption cross-section of PSII light harvesting  | m <sup>2</sup> PSII <sup>-1</sup> |
| $\sigma_{\text{PII}}$  | $\sigma_{\text{PII}}'$ | Absorption cross-section of PSII photochemistry    | m <sup>2</sup> PSII <sup>-1</sup> |
| $\sigma_{\text{FII}}$  | $\sigma_{\text{FII}}'$ | Absorption cross-section of PSII fluorescence      | m <sup>2</sup> PSII <sup>-1</sup> |
| $\sigma_{\text{DII}}$  | $\sigma_{\text{DII}}'$ | Absorption cross-section of PSII non-radiative     | m <sup>2</sup> PSII <sup>-1</sup> |
| $a_{\text{LHII}}$      |                        | Absorption coefficient of PSII light harvesting    | m <sup>-1</sup>                   |
| $a_{\text{PII}}$       | $a_{\text{PII}}'$      | Absorption coefficient of PSII photochemistry      | m <sup>-1</sup>                   |
| $a_{\text{FII}}$       | $a_{\text{FII}}'$      | Absorption coefficient of PSII fluorescence        | m <sup>-1</sup>                   |
| $a_{\text{DII}}$       | $a_{\text{DII}}'$      | Absorption coefficient of PSII non-radiative decay | m <sup>-1</sup>                   |

729

730

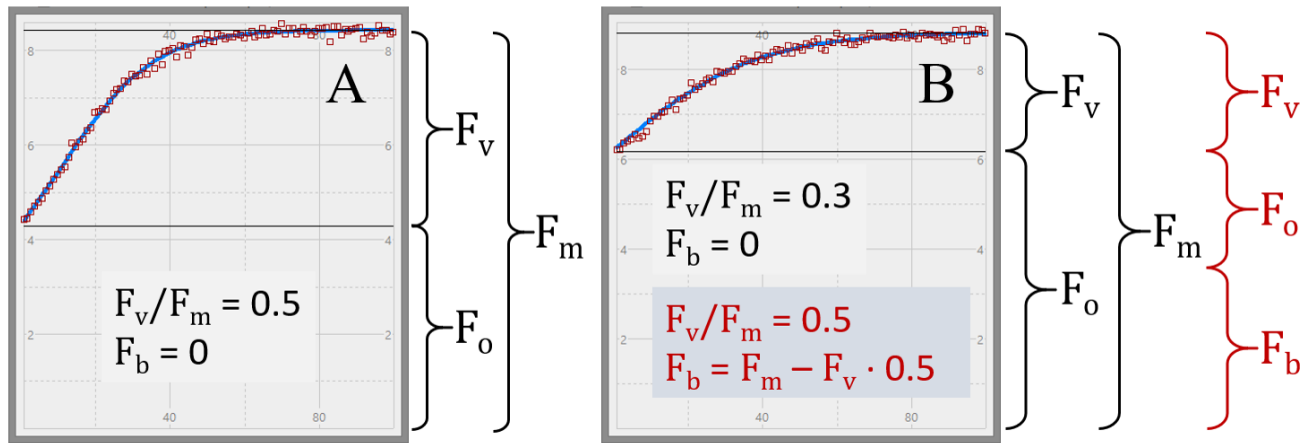

731

732 **Figure 1.** STAF measurements from *E. huxleyi* illustrating the concept of baseline fluorescence ( $F_b$ ).  
 733 (A) is from a nutrient-replete culture in log-growth phase. (B) is from a N-limited culture. Two  
 734 plausible explanations for the lower  $F_v/F_m$  in (B) are considered within the main text. The first  
 735 assumes that  $F_b$  is zero, as indicated by the black text in (B) and the second assumes that  $F_b$  has a  
 736 value that accounts for the entire difference in  $F_v/F_m$  between (A) and (B). All terms used are  
 737 described within Terminology.

738



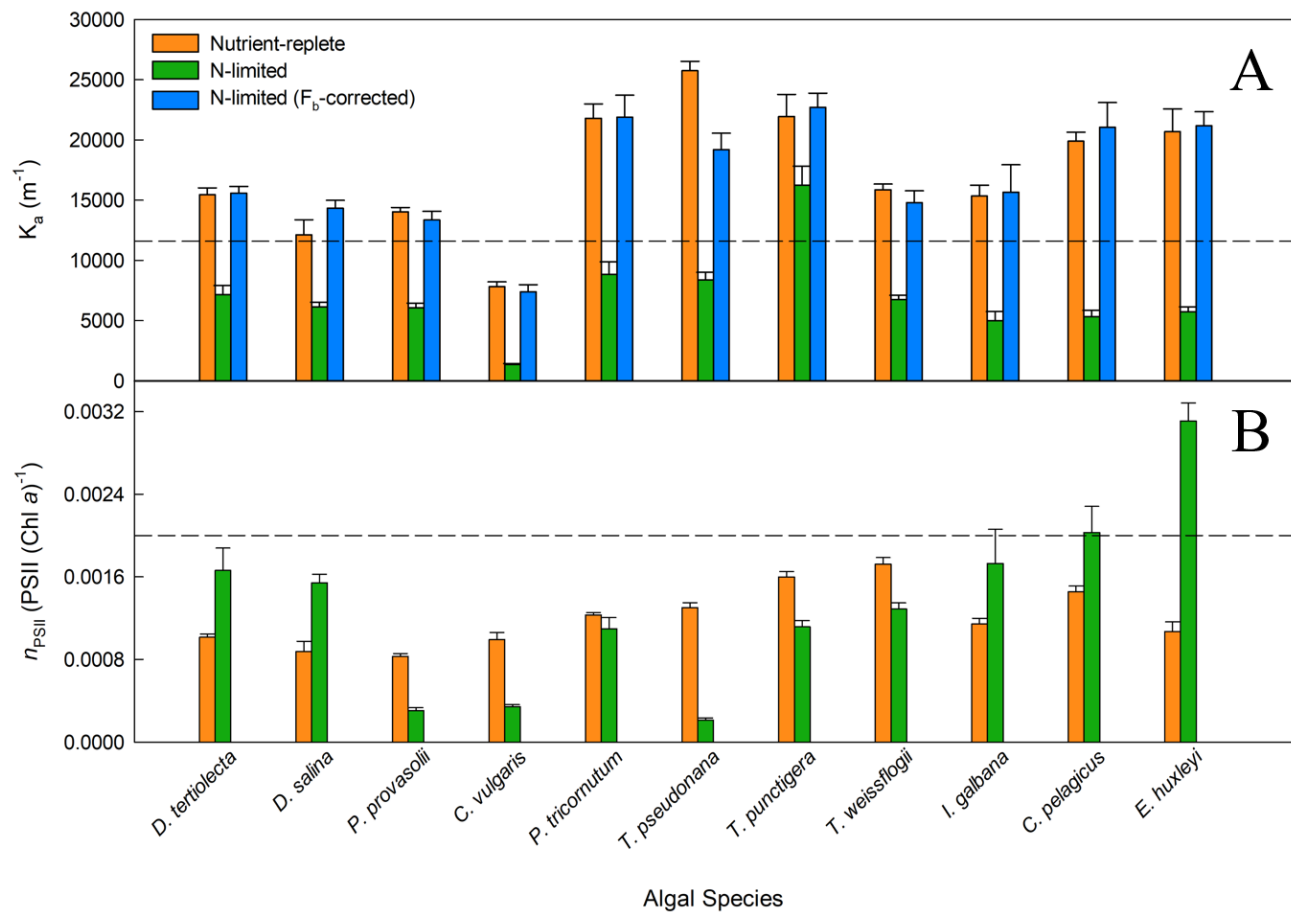

739

740 **Figure 2.** Variability in  $K_a$  (A) and  $n_{PSII}$  (B) values measured across a range of phytoplankton  
 741 species. In (A), the consensus  $F_v/F_{mc}$  value of 0.518 (see main text) was used to calculate  $F_b$  for each  
 742 culture when the measured  $F_v/F_m$  was lower than 0.518.  $F_b$  was subtracted from the measured  $F_o$  and  
 743  $F_m$ . The dashed line represents  $K_a^{FO}$  ( $11,800 m^{-1}$ ). Significant differences were tested by a series of  
 744 parametric t-tests (t-test;  $P < 0.05$ ); however, if normality was not achieved after data transformation  
 745 a Mann-Whitney Rank Sum test was performed. All nutrient-replete and uncorrected N-limited  $K_a$   
 746 values were significantly different. In (B), the number of PSII reaction centers per chlorophyll *a*  
 747 molecule was calculated from flash  $O_2$  measurements and chlorophyll *a* extractions. More details are  
 748 provided within Materials and methods.

749

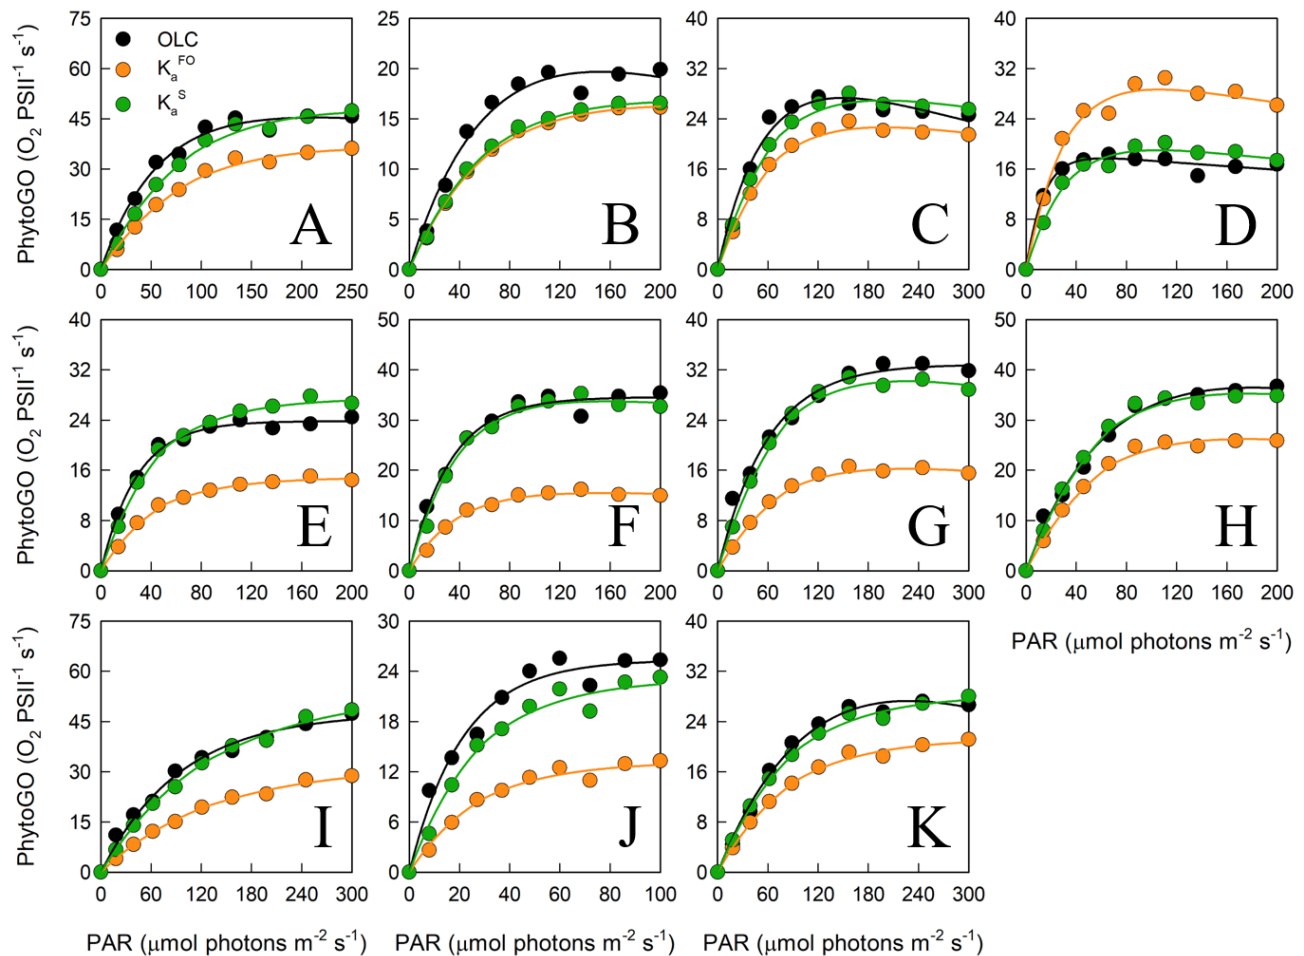

750

751 **Figure 3.** A representative example of simultaneous oxygen light curve (OLC) and fluorescence light  
 752 curve (FLC) measurements made across all phytoplankton species. The OLC and FLC measurements  
 753 were made on cultures acclimated to ambient temperature (~ 20 °C) and low-light (LL = 30 μmol  
 754 photons m<sup>-2</sup> s<sup>-1</sup>). FLC data were standardized to equivalent units of O<sub>2</sub>, with both OLC and FLC data  
 755 normalized to a derived concentration of functional PSII complexes (O<sub>2</sub> PSII<sup>-1</sup> s<sup>-1</sup>). FLC data were  
 756 derived using  $K_a^{FO}$  (11,800 m<sup>-1</sup>) or a sample-specific ( $K_a^S$ ) value. The solid lines represent the P-E  
 757 curve fits (color-coded to match the data points). Panel (A) = *D. tertiolecta*; (B) = *D. salina*; (C) = *P.*  
 758 *provasolii*; (D) = *C. vulgaris*; (E) = *P. tricornutum*; (F) = *T. pseudonana*; (G) = *T. punctigera*; (H) =  
 759 *T. weissflogii*; (I) = *C. pelagicus*; (J) = *E. huxleyi*; (K) = *I. galbana*. Replicates from each species ( $n =$   
 760 5) are presented in Supplementary Figures 3 to 13.

761

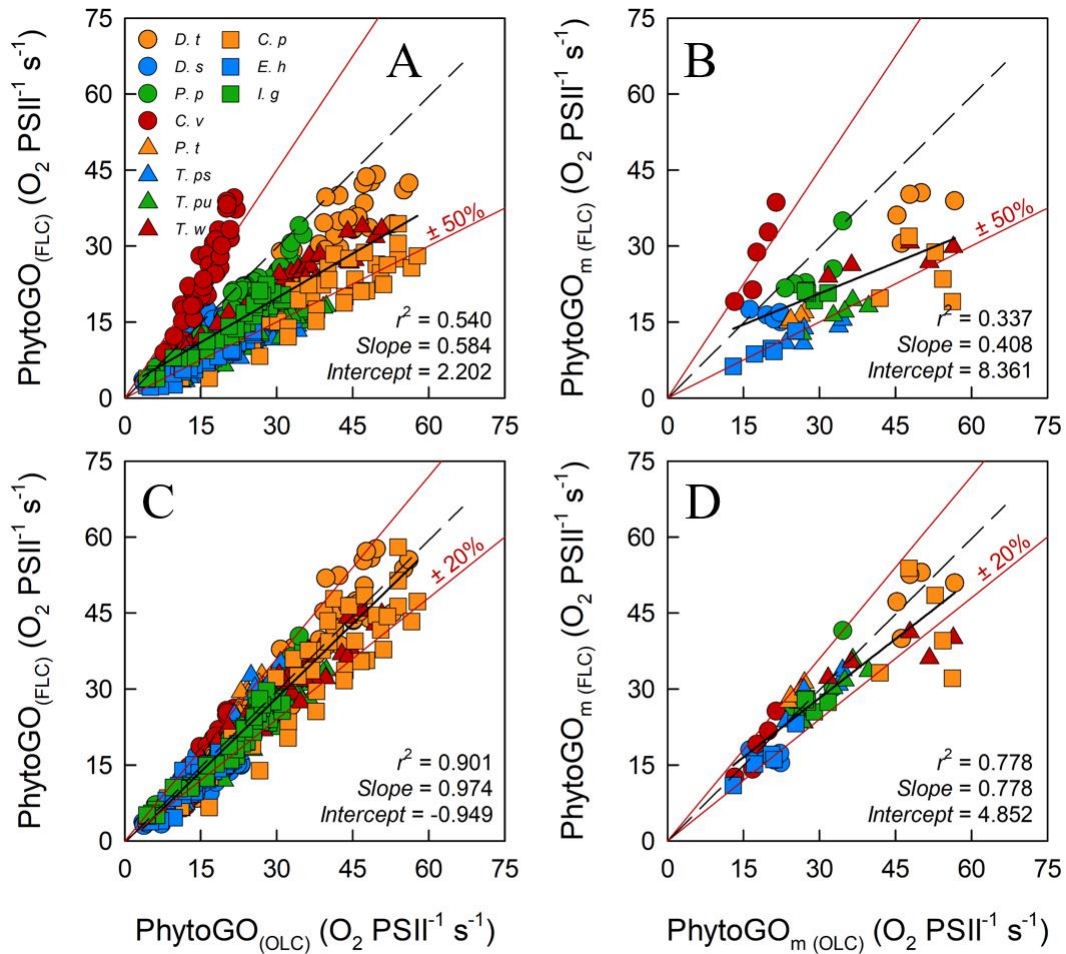

762

763 **Figure 4.** The relationship between the entire photosynthesis-photon irradiance (P-E) curve of  
 764 PhytoGO, (A) and (C), and the maximum PhytoGO (PhytoGO<sub>m</sub>) from simultaneous OLC and FLC  
 765 measurements, (B) and (D). FLC data were standardized to equivalent units of  $O_2$ , with both OLC  
 766 and FLC data normalized to a derived concentration of functional PSII complexes ( $O_2$  PSII $^{-1}$  s $^{-1}$ ).  
 767 Within (A) and (B), FLC data were derived using  $K_a^{FO}$  (11,800  $m^{-1}$ ). Within (B) and (D), sample-  
 768 specific values of  $K_a$  were used (see Materials and methods). Each species consisted of 5 biological  
 769 replicates. The dashed line represents a 1:1 line, while the solid line is the linear regression used to  
 770 generate  $r^2$ , slope and intercept values. A key for the symbols in (A) is incorporated within Table 1.

771

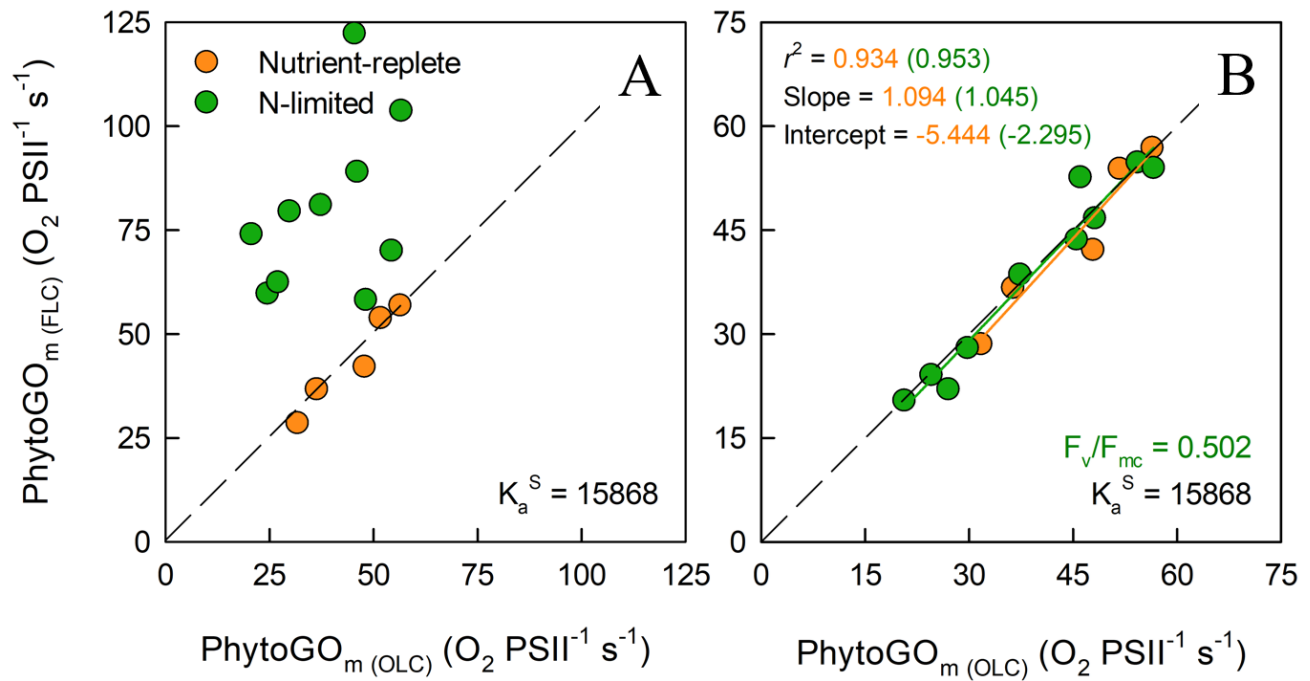

772

773 **Figure 5.** The relationship between simultaneous OLC and FLC measurements of maximum  
774 PhytoGO (PhytoGO<sub>m</sub>) within N-limited ( $n = 10$ ) and nutrient replete ( $n = 5$ ) *T. weissflogii* cultures.  
775 The sample-specific  $K_a$  value from the nutrient-replete cultures was applied throughout. In (A), no  $F_b$   
776 correction was applied. In (B), the N-limited values were  $F_b$ -corrected by applying a consensus  
777  $F_v/F_{mc}$  value of 0.502. Further details are provided within Materials and methods.

778

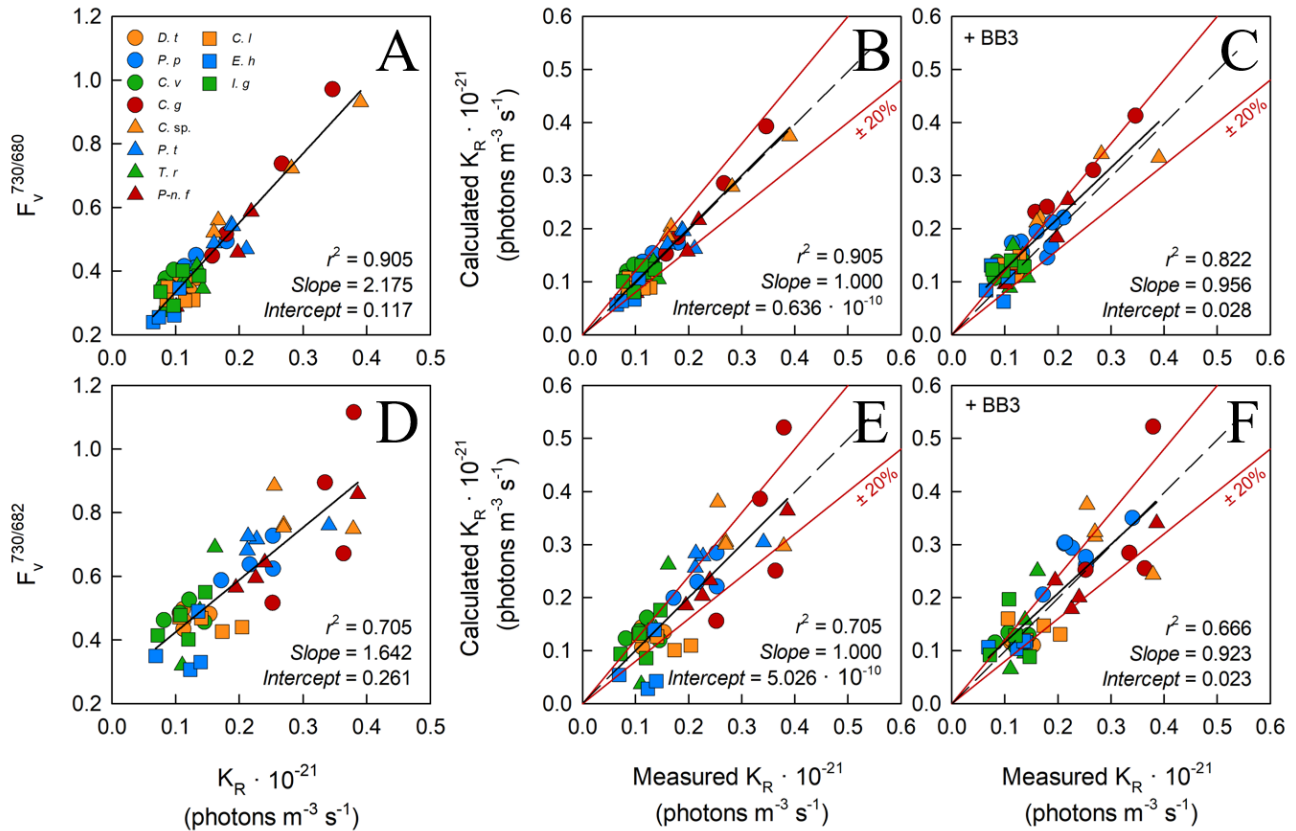

779

780 **Figure 6.** The relationship between dual wavelength STAF measurements and the sample-specific  $K_a$   
 781 values using the flash  $O_2$  method. The leftmost panels show the ratio of  $F_v$  measured by B730 to  $F_v$   
 782 measured by B680 (A) and  $F_v$  measured by B730 to  $F_v$  measured by B682 (D) against the measured  
 783  $K_a$  value from parallel measurements of flash  $O_2$ . The middle panels, (B) and (E) show the  
 784 relationship between flash  $O_2$ -derived  $K_a$  and dual waveband-derived  $K_a$  values. The dual waveband  
 785  $K_a$  values within these panels were derived using the slopes and offsets reported in (A) and (D), as  
 786 appropriate. The rightmost panels, (C) and (E), show the same relationships as reported in (B) and  
 787 (E), respectively, but in the presence of extracellular baseline fluorescence ( $F_b$ ) generated by a spike  
 788 of BB3 (see Materials and methods). The dashed lines in each panel represents a 1:1 slope, the solid  
 789 black line is the linear regression. The solid red lines represent  $\pm 20\%$  of the regression values.
